# Supplementary material for: Loss of type 9 adenylyl cyclase triggers reduced phosphorylation of Hsp20 and diastolic dysfunction
Source: PubMed Central journal article supplement (PMC5514062; doi:10.1038/s41598-017-05816-w), 2017-07-17

## Loss of type 9 adenylyl cyclase triggers reduced phosphorylation of Hsp20 and diastolic dysfunction

Yong Li<sup>1</sup>, Tanya A. Baldwin<sup>1</sup>, Yan Wang, Janani Subramaniam<sup>1</sup>, Anibal Garza Carbajal<sup>1</sup>, Cameron S Brand<sup>2</sup>, Shane R Cunha<sup>1</sup>, and Carmen W Dessauer<sup>1,\*</sup>

<sup>1</sup>Dept. Integrative Biology and Pharmacology, McGovern Medical School, University of Texas Health Science Center, Houston, TX 77030

**Supplementary Table 1. Cardiac parameters for WT and AC9<sup>-/-</sup> mice.**

| Parameter <sup>#</sup>              | WT            | AC9 <sup>-/-</sup> | P value |
|-------------------------------------|---------------|--------------------|---------|
| <b>M-mode Echocardiography</b>      |               |                    |         |
| LV anterior wall, diastole (mm)     | 0.70 +/- 0.06 | 0.72 +/- 0.05      | n.s.    |
| LV anterior wall, systole (mm)      | 0.90 +/- 0.08 | 1.01 +/- 0.08      | n.s.    |
| LV internal diastolic diameter (mm) | 3.6 +/- 0.1   | 3.7 +/- 0.1        | n.s.    |
| LV internal systolic diameter (mm)  | 2.6 +/- 0.1   | 2.7 +/- 0.1        | n.s.    |
| LV posterior diastolic wall (mm)    | 0.76 +/- 0.08 | 0.69 +/- 0.04      | n.s.    |
| LV posterior systolic wall (mm)     | 0.94 +/- 0.06 | 1.14 +/- 0.07      | n.s.    |
| EF (%)                              | 53 +/- 3      | 51 +/- 4           | n.s.    |
| FS (%)                              | 27 +/- 2      | 26 +/- 3           | n.s.    |
| LV Mass, corrected (mg)             | 73 +/- 12     | 73 +/- 7           | n.s.    |
| End diastolic volume (μL)           | 55 +/- 4      | 58 +/- 4           | n.s.    |
| End systolic volume (μL)            | 26 +/- 3      | 28 +/- 3           | n.s.    |

## Supplementary Figure Legends.

**Fig S1. SAN shows connexin 45 (Cx45) but not Cx43 expression.**

**Fig S2. Inhibition of PKA abolishes isoproterenol-stimulated phosphorylation of Hsp20.** Rat neonatal cardiomyocytes were pretreated in the absence or presence of 10  $\mu$ M of the PKA inhibitor H89 for 10 min followed by vehicle (AT) or isoproterenol (1  $\mu$ M) for 5 min. Cells were lysed and subjected to WB analysis for phosphorylation of Hsp20 (n=3).

**Fig S3. Deletion of AC9 does not alter PKA phosphorylation of Troponin I and phospholamban.** WT and AC9<sup>-/-</sup> mice were injected with saline or isoproterenol (2  $\mu$ g/g body weight, IP). Animals were sacrificed 4 min later and heart tissue was harvested. Cardiac extracts were prepared in the presence of phosphatase inhibitors. Equal protein supernatants were subjected to WB analysis with **A)** anti-p-Troponin 1 and **B)** anti-p-PLN. The corresponding total protein was quantitated by WB (n=5-7) and the ratio of phosphoprotein to total is shown for each replicate.

**Fig S4. Immunoprecipitation of Yotiao fails to pull-down Hsp20 in heart.** IP of heart extracts from WT or AC9<sup>-/-</sup> mice with rabbit IgG (control) or anti-Yotiao were subjected to WB analysis for Hsp20 and Yotiao (n=3).

**Fig S5. Mutation of D399A in AC9 has dramatically reduced catalytic activity.** Membranes were prepared from Sf9 cells expressing  $\beta$ -gal, AC9, or AC9-D399A. AC activity was measured upon stimulation with 300 nM GTP $\gamma$ S-G $\alpha$ s (n=3). WB of membrane proteins is shown.

**Fig S6. Full-length western blots for figures 1-5 in the main paper.**

## Supplementary Figures.

### Fig S1

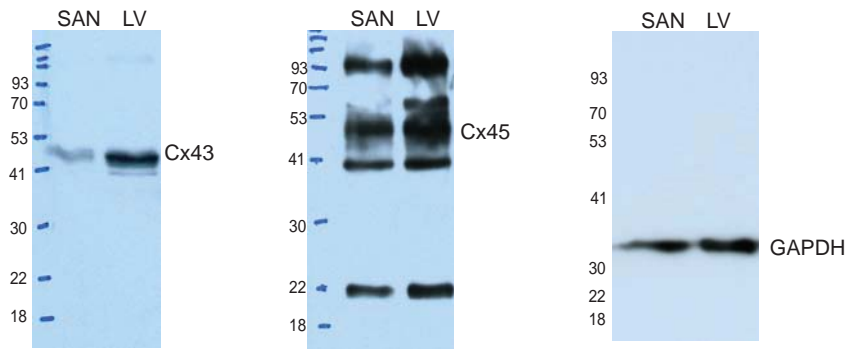

### Fig S2

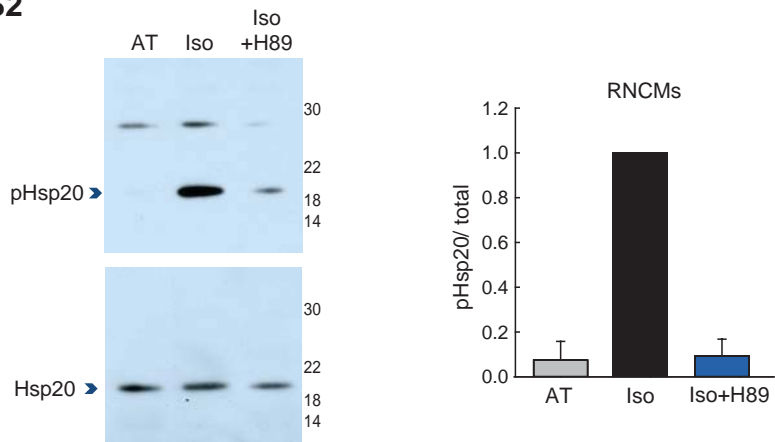

### Fig S3

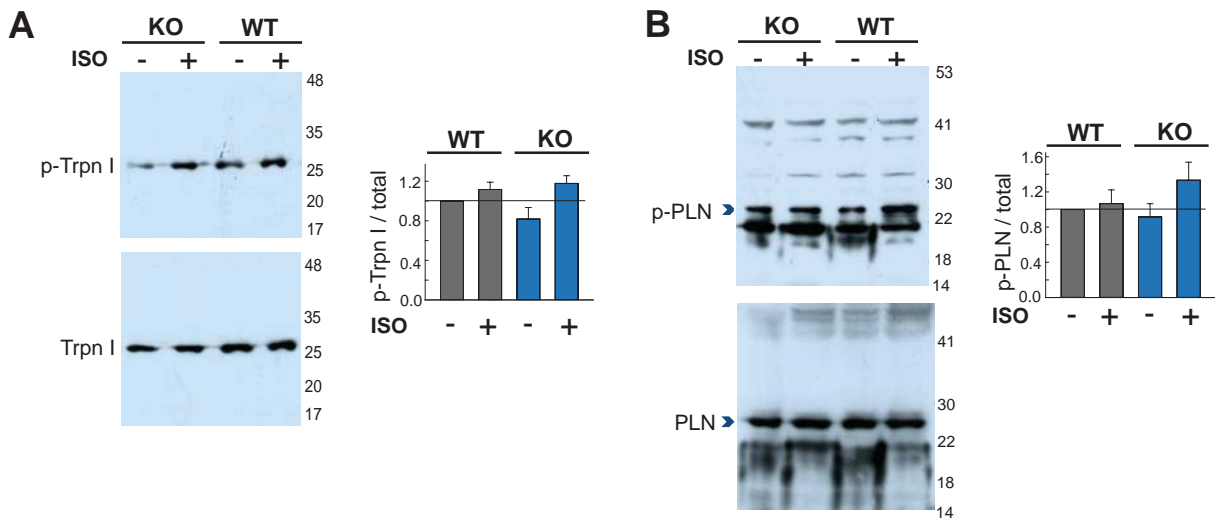

**Fig S4**

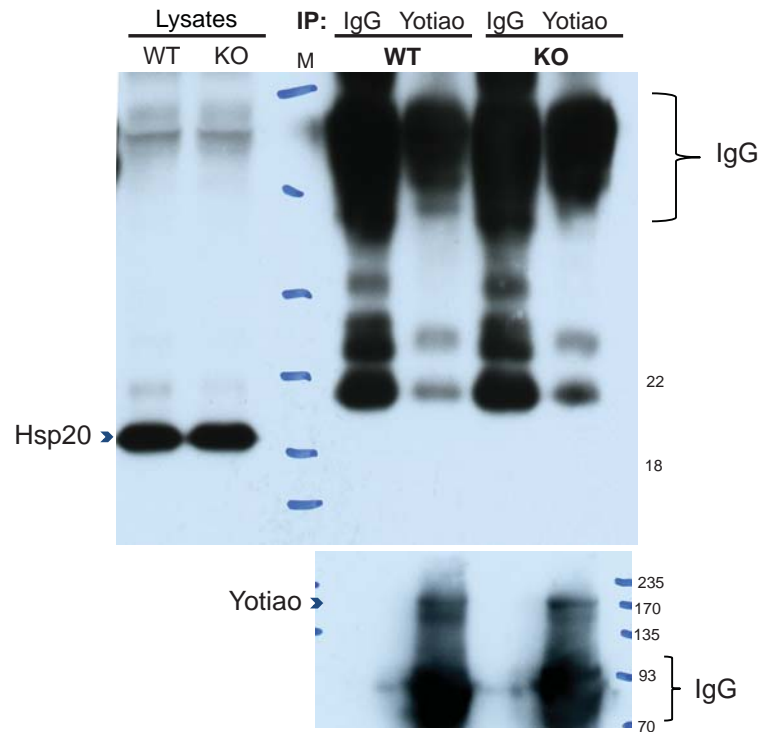

**Fig S5**

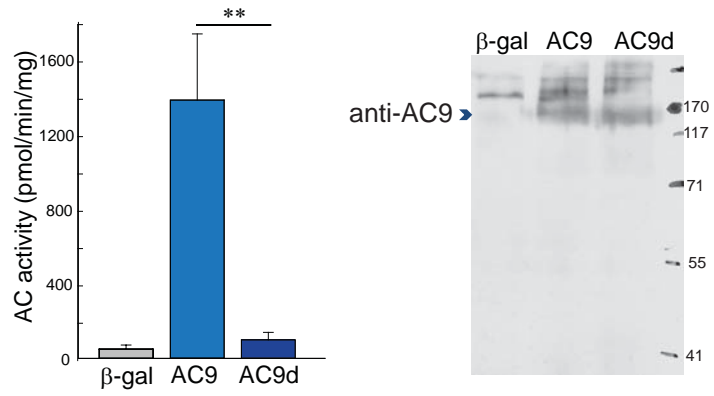

Supplemental Fig 6. Full length western blots.

**1C**

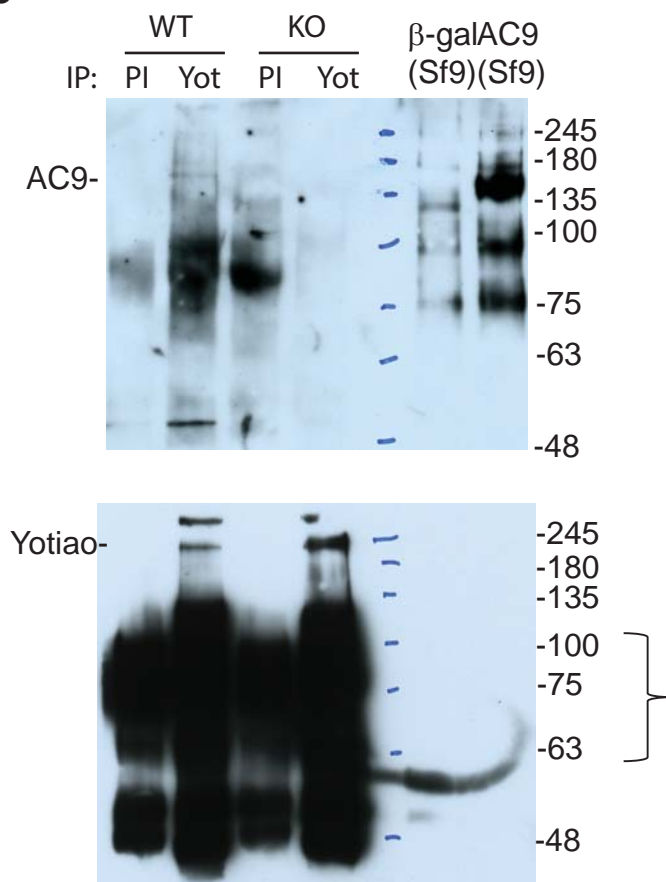

Supplemental Fig 6. Full length western blots, cont.

2C

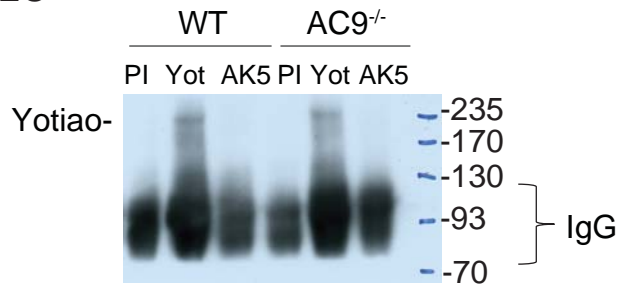

2D

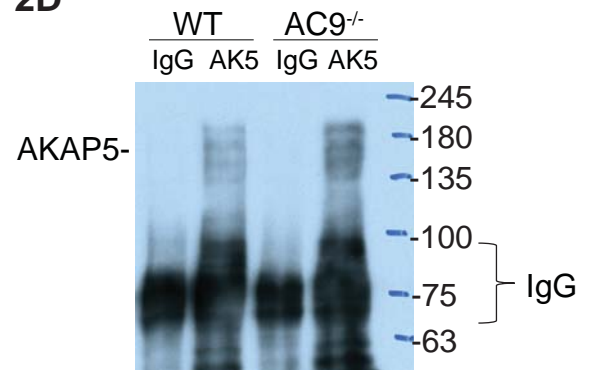

2E

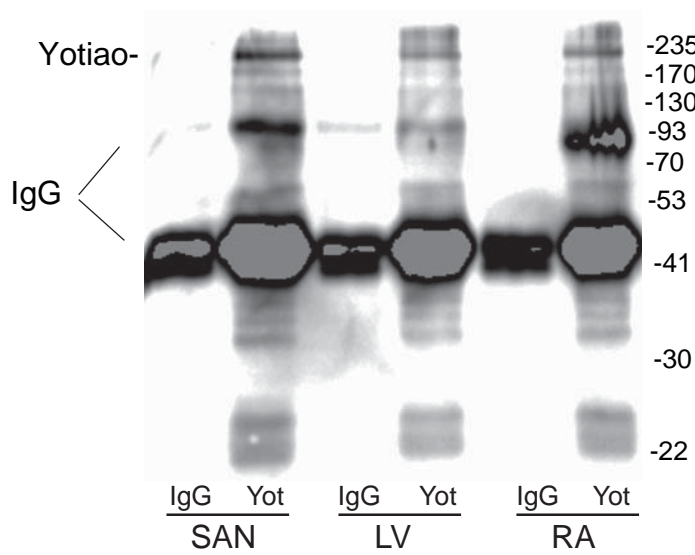

2F

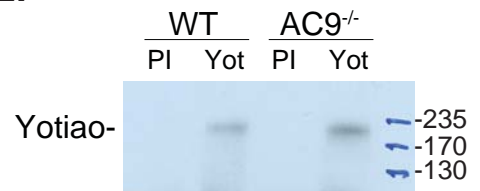

Supplemental Fig 6. Full length western blots, cont.

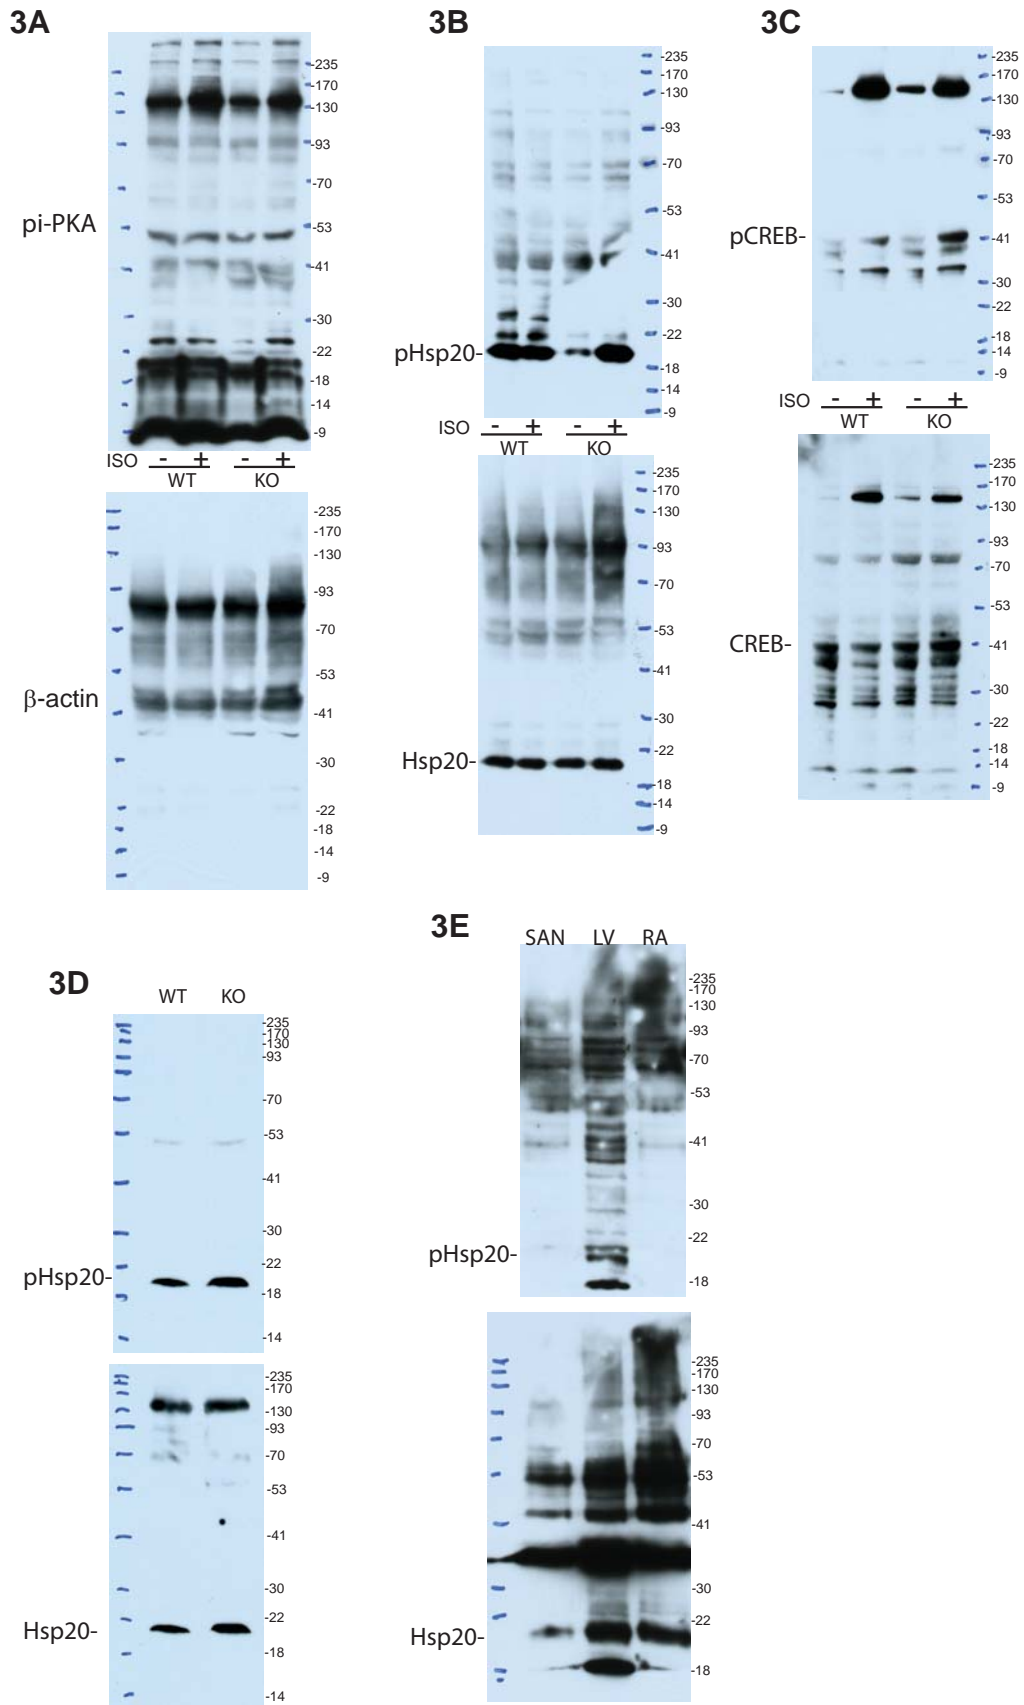

**4A**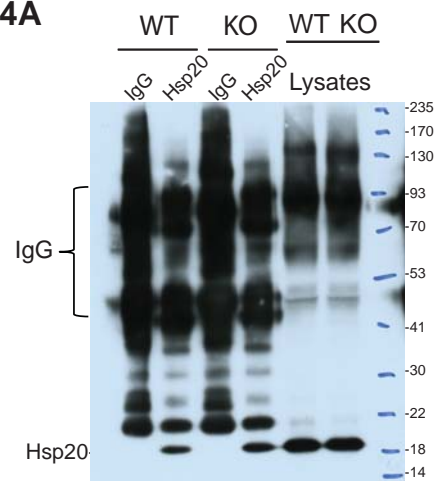**4B**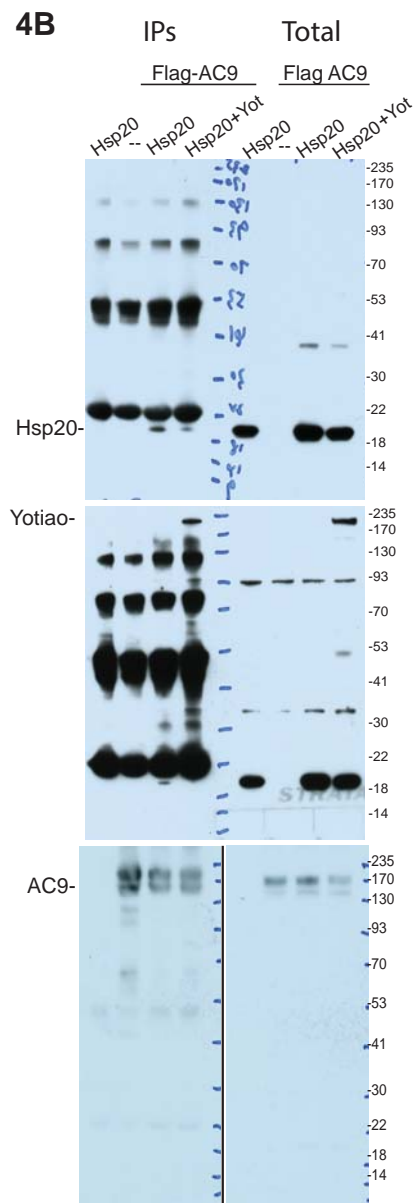**4C**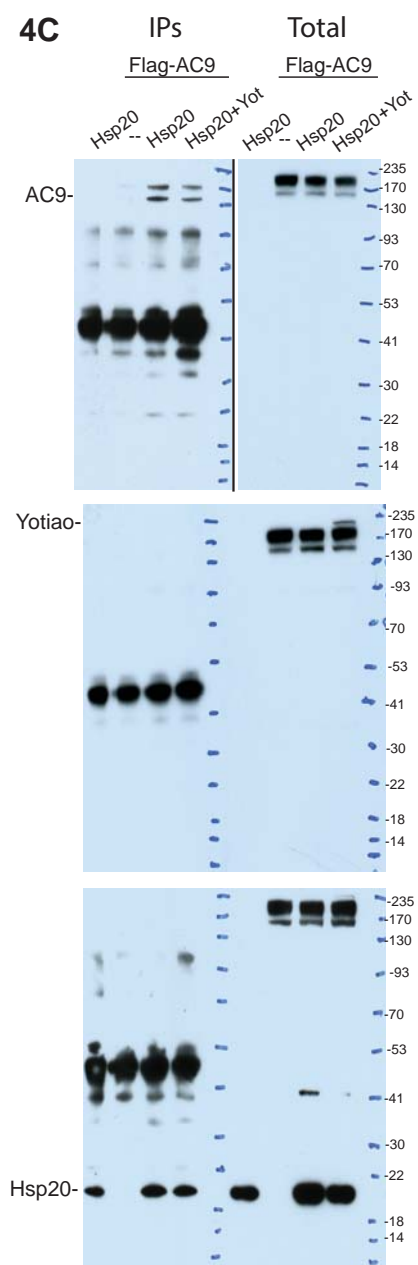



Supplemental Fig 6. Full length western blots, cont.

5

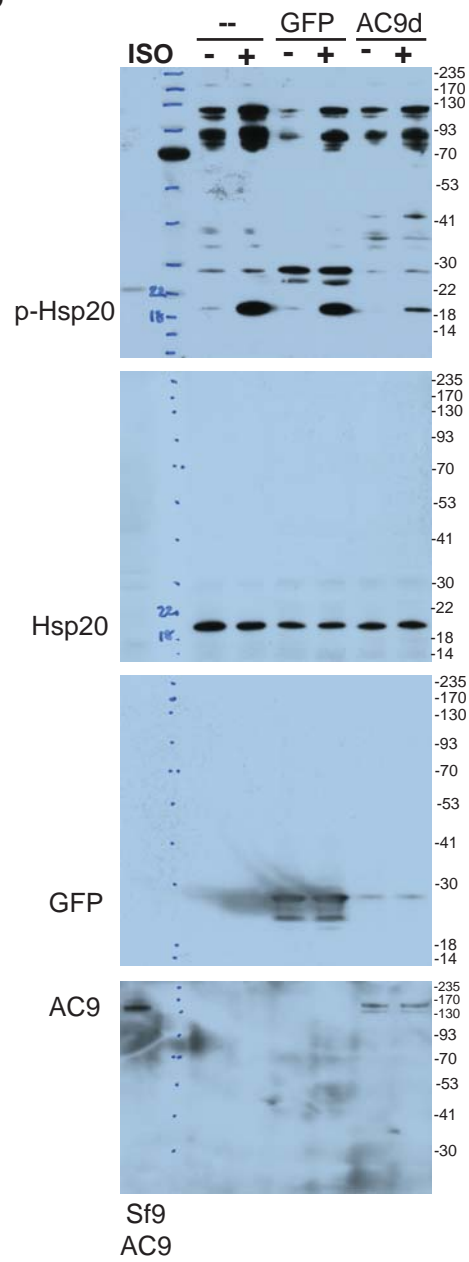

Supplement: 41598_2017_5816_MOESM1_ESM.pdf [file 41598_2017_5816_MOESM1_ESM.pdf]
